# Supplementary material
Source: PubMed Central journal article supplement (PMC11181805)
Supplement: NIHMS1998296-supplement-Supplement.pdf [file NIHMS1998296-supplement-Supplement.pdf]

Cushman et al

10-Year Differences in Women's Awareness Related to Coronary Heart Disease: Results of the 2019 American Heart Association National Survey: A Special Report From the American Heart Association

**Supplemental Tables**

Supplemental Table 1. New Questions in the 2019 Triennial Survey on Women's Awareness of Cardiovascular Disease

|                                                                                                                                                                                                                                                                                                                                                                                                                                                                        |
|------------------------------------------------------------------------------------------------------------------------------------------------------------------------------------------------------------------------------------------------------------------------------------------------------------------------------------------------------------------------------------------------------------------------------------------------------------------------|
| <b>General Awareness of Women's Health Issues</b>                                                                                                                                                                                                                                                                                                                                                                                                                      |
| How informed do you feel about the following? 1. Women's health in general, 2. Heart disease in women, 3. Stroke in women, 4. Venous thromboembolism or pulmonary embolism in women, 5. Brain health in women                                                                                                                                                                                                                                                          |
| <b>Understanding of Heart Attack and Stroke</b>                                                                                                                                                                                                                                                                                                                                                                                                                        |
| Based on what you know, what are the major causes of stroke?                                                                                                                                                                                                                                                                                                                                                                                                           |
| <b>Behaviors Associated with Prevention</b>                                                                                                                                                                                                                                                                                                                                                                                                                            |
| When was the last time you were seen by a health care professional?                                                                                                                                                                                                                                                                                                                                                                                                    |
| As far as you know, which of the following best represents the American Heart Association's recommendations regarding physical activity?                                                                                                                                                                                                                                                                                                                               |
| As far as you know, what actions can lower blood pressure levels or lower risk of having high blood pressure?                                                                                                                                                                                                                                                                                                                                                          |
| As far as you know, which of the following, if any, increase the risk for dementia or negatively affect brain health? Please select all that apply                                                                                                                                                                                                                                                                                                                     |
| <b>F.A.S.T Questions</b>                                                                                                                                                                                                                                                                                                                                                                                                                                               |
| How familiar are you with F.A.S.T., an acronym or system used to help identify the signs of a stroke?                                                                                                                                                                                                                                                                                                                                                                  |
| What do you think the letters in F.A.S.T. stand for?                                                                                                                                                                                                                                                                                                                                                                                                                   |
| <b>Venous Thromboembolism</b>                                                                                                                                                                                                                                                                                                                                                                                                                                          |
| As far as you know, what is a venous thromboembolism (VTE)?                                                                                                                                                                                                                                                                                                                                                                                                            |
| As far as you know, are each of the following true, false, or are you not sure?<br>1. Venous thromboembolism (VTE) can only occur in people 60 years or older.<br>2. Venous thromboembolism (VTE) is the 2nd leading cause of death in pregnancy.<br>3. Women who are pregnant, or have just had a baby, are at greater risk of developing venous thromboembolism (VTE).<br>4. Venous thromboembolism (VTE) is not preventable.                                        |
| <b>Pregnancy</b>                                                                                                                                                                                                                                                                                                                                                                                                                                                       |
| Which of the following complications, if any, have you ever experienced during pregnancy? Please select all that apply<br>1. High blood pressure, 2. Gestational diabetes, 3. Preeclampsia, 4. Preterm labor, 5. A loss of pregnancy, or miscarriage, 6. Ectopic pregnancy, 7. Low birth weight, 8. Deep vein thrombosis (DVT) blood clots in veins or pulmonary embolism (PE) blood clots in lungs, 9. None of these, 10. Not applicable – I have never been pregnant |

Cushman et al

10-Year Differences in Women's Awareness Related to Coronary Heart Disease: Results of the 2019 American Heart Association National Survey: A Special Report From the American Heart Association

**Supplemental Tables**

|                                                                                                                                                                                                                                                                                                                                                                                                           |
|-----------------------------------------------------------------------------------------------------------------------------------------------------------------------------------------------------------------------------------------------------------------------------------------------------------------------------------------------------------------------------------------------------------|
| <b>Custom Demographics</b>                                                                                                                                                                                                                                                                                                                                                                                |
| Which of the following forms of technology, if any, do you currently use to monitor or improve your health? Please select all that apply<br>1. Smart phone, 2. Tablets or other handheld devices (e.g., kindle, iPad), 3. Wearable technology (e.g., activity trackers, virtual reality headsets), 4. Smart watches (e.g., Apple watch, iTouch), 5. Apps,<br>6. None of the above                         |
| Which of the following personal health actions have you ever used technology for? Please select all that apply<br>1. Tracking my blood pressure, 2. Managing my weight, 3. Communicating with my health care professionals, 4. Monitoring my health conditions, 5. Tracking my sleep, 6. Fitness/exercise activities,<br>7. Monitoring my physical activity, monitoring my heart rate, 9. Other, specify: |
| In general, how helpful has technology been when it comes to monitoring or improving your health?                                                                                                                                                                                                                                                                                                         |
| <b>Classification Data</b>                                                                                                                                                                                                                                                                                                                                                                                |
| On average, how many hours do you sleep at night? [RANGE 0-24] hours                                                                                                                                                                                                                                                                                                                                      |
| About how often each week do you get at least 150 minutes per week of moderate-intensity aerobic activity or 75 minutes per week of vigorous aerobic activity, or a combination of both, preferably spread throughout the week?                                                                                                                                                                           |

**Supplemental Tables**

Supplemental Table 2: Responses (Percentages) to the First Action One Would Take if Thought to be Experiencing Signs of a Heart Attack among US Women by Race/Ethnicity and Age: 2009 vs. 2019

|                                     | Overall |       | Race/Ethnicity |       |          |      |          |       |          |      | Age group (years) |       |       |       |       |       |      |       |
|-------------------------------------|---------|-------|----------------|-------|----------|------|----------|-------|----------|------|-------------------|-------|-------|-------|-------|-------|------|-------|
|                                     |         |       | NH White       |       | NH Black |      | Hispanic |       | NH Asian |      | 25-34             |       | 35-44 |       | 45-64 |       | 65+  |       |
|                                     | 2009    | 2019  | 2009           | 2019  | 2009     | 2019 | 2009     | 2019  | 2009     | 2019 | 2009              | 2019  | 2009  | 2019  | 2009  | 2019  | 2009 | 2019  |
| <b>N</b>                            | 1158    | 1345  | 634            | 660   | 127      | 209  | 251      | 216   | 125      | 200  | 205               | 278   | 305   | 284   | 455   | 525   | 193  | 258   |
| <b>Response<sup>†</sup></b>         |         |       |                |       |          |      |          |       |          |      |                   |       |       |       |       |       |      |       |
| Call 911                            | 47.5    | 54.4* | 48.1           | 55.6* | 45.4     | 50.4 | 45.0     | 58.9* | 50.5     | 43.8 | 53.3              | 57.1* | 47.8  | 45.7  | 46.6  | 54.5* | 44.5 | 58.7* |
| Take an aspirin                     | 23.4    | 14.3* | 26.0           | 16.5* | 21.2     | 15.6 | 15.9     | 6.1   | 13.1     | 6.4  | 16.4              | 6.6   | 19.0  | 6.6*  | 25.7  | 16.4* | 29.2 | 23.3  |
| Alert someone / call / ask for help | 4.4     | 7.6*  | 3.8            | 7.3*  | 4.4      | 5.7  | 6.8      | 10.5* | 8.1      | 10.8 | 11.9              | 10.4  | 3.5   | 12.5* | 3.8   | 5.1   | 0.8  | 5.5*  |
| Go to the hospital                  | 9.4     | 7.5   | 9.5            | 7.3   | 9.8      | 8.3  | 9.2      | 9.1   | 7.7      | 5.8  | 3.8               | 5.2   | 9.1   | 7.6   | 10.5  | 11.1  | 11.9 | 3.9*  |
| Call your doctor                    | 2.8     | 2.7   | 2.3            | 2.3   | 4.5      | 3.4  | 3.3      | 1.0   | 4.4      | 10.6 | 3.3               | 4.5   | 2.6   | 3.7   | 2.7   | 2.7   | 2.9  | 0.5   |

Data were weighted by age, race/ethnicity, educational attainment, household income, and region to reflect the composition of the US population of women 25+ years of age who speak English based on distributions reported in the US Census Bureau's March 2018 Current Population Survey.<sup>1</sup>

\* p < 0.05 compared to 2009

<sup>†</sup>Other responses at 1-3% overall in both years: call for an ambulance, sit/lay down/relax/get comfortable, call a family member, none/nothing, other, refused to respond

NH, non-Hispanic

1. Current Population Survey. <https://www.census.gov/programs-surveys/cps.html>. Accessed November 9, 2019.
